# Supplementary material for: Thermo-Responsive Cellulose-Based Material with Switchable Wettability for Controllable Oil/Water Separation
Source: MDPI journal article supplement (doi:10.3390/polym10060592), 2018-05-28
Supplement: s1 [file s1]

---

## Highlights

- A novel thermo-responsive cellulose-based material for oil/water separation was prepared and characterized.
- The material could selectively separate oil from the oil/water mixture by adjusting the temperature.
- The material exhibited a good regeneration performance.
- A possible thermo-responsive mechanism was recovered by In-situ variable-temperature NMR and AFM analysis.
